# Supplementary material
Source: PubMed Central journal article supplement (PMC3890815)
Supplement: 1305438111_pnas.201305438SI.pdf [file 1305438111_pnas.201305438SI.pdf]

# Supporting Information

Wang et al. 10.1073/pnas.1305438111

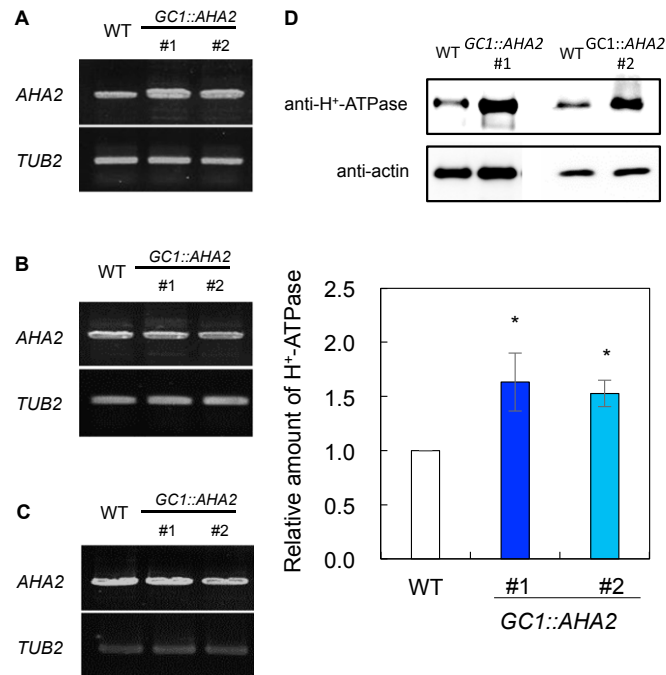

**Fig. S1.** Reverse transcription–PCR (RT-PCR) and immunoblot analysis of *AHA2*-transgenic plants. (A–C) RT-PCR analysis of *AHA2* in wild-type (WT) and two *AHA2*-transgenic lines (*GC1::AHA2* #1 and #2) in epidermal tissue (A), leaves (B), and roots (C). *TUBULIN BETA CHAIN2* (*TUB2*) was used as a control. (D) Immunoblot analysis was performed according to a previous method (1) with modifications. The epidermal fragments were homogenized in an ice-cold homogenization buffer using a mortar and pestle. The homogenate was solubilized by adding a half-aliquot of SDS sample buffer. The solubilized sample was centrifuged at  $12,000 \times g$  for 1 min, and the resulting supernatant was subjected to SDS/PAGE. Polyclonal antibodies raised against the catalytic domain of *Arabidopsis AHA2* were described previously (1). Actin protein was detected using anti-actin antibody as a control. The relative amount of  $H^+$ -ATPase was quantified as the ratio of  $H^+$ -ATPase to actin signal intensity. Values are means  $\pm$  SEM ( $n = 3$  independent experiments). Significant differences were detected by Student  $t$  test (\* $P < 0.05$ ).

1. Hayashi M, Inoue S, Takahashi K, Kinoshita T (2011) Immunohistochemical detection of blue light-induced phosphorylation of the plasma membrane  $H^+$ -ATPase in stomatal guard cells. *Plant Cell Physiol* 52(7):1238–1248.

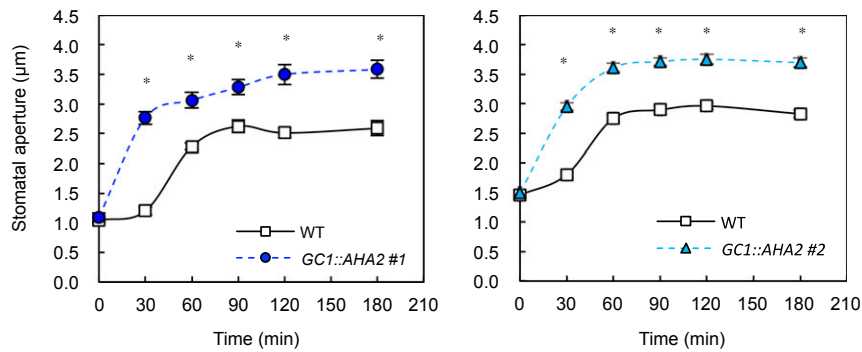

**Fig. S2.** Time course of stomatal aperture under light ( $50 \mu\text{mol}\cdot\text{m}^{-2}\cdot\text{s}^{-1}$  red light and  $10 \mu\text{mol}\cdot\text{m}^{-2}\cdot\text{s}^{-1}$  blue light). *GC1::AHA2 #1* (left panel) or #2 (right panel) was compared with the WT, respectively. Stomatal aperture values are the means of measurements of 25 stomata; error bars represent the SEM. Significant differences in stomatal aperture were detected using Student *t* test ( $*P < 0.001$ ).

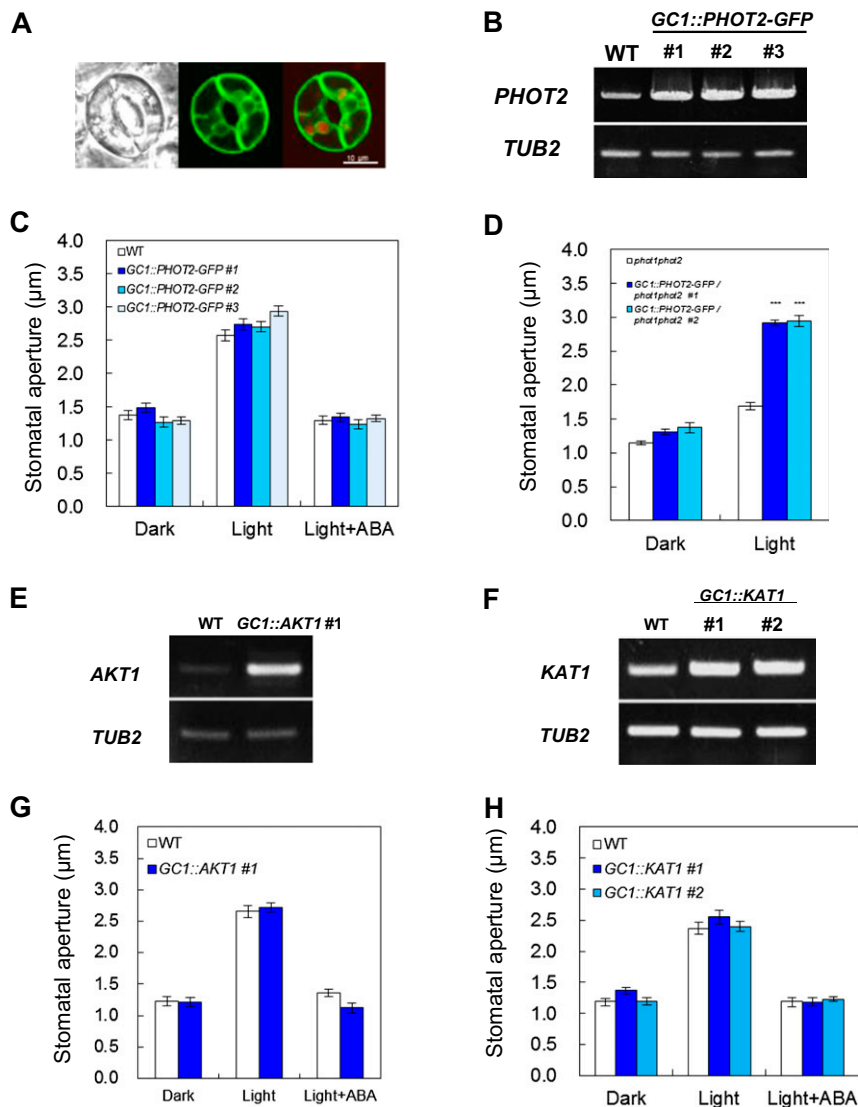

**Fig. S3.** Overexpression of *PHOTOTROPIN 2* (*PHOT2*)-GFP, *ARABIDOPSIS K<sup>+</sup> TRANSPORTER 1* (*AKT1*), or *POTASSIUM CHANNEL IN ARABIDOPSIS THALIANA 1* (*KAT1*) using the *GC1* promoter had no effect on stomatal opening. (A) Bright-field and fluorescent images of typical stomata from *GC1::PHOT2-GFP*. (B, E, and F) RT-PCR analyses of *PHOT2*, *AKT1*, *KAT1*, and *TUB2* in the WT and the transgenic plants *GC1::PHOT2-GFP*, *GC1::AKT1*, and *GC1::KAT1*. *TUB2* was used as a control. (C, G, and H) Stomatal apertures under 2.5 h of darkness, light (red light of  $50 \mu\text{mol}\cdot\text{m}^{-2}\cdot\text{s}^{-1}$  and blue light of  $10 \mu\text{mol}\cdot\text{m}^{-2}\cdot\text{s}^{-1}$ ), or light in the presence of 20  $\mu\text{M}$  abscisic acid (ABA). (D) Stomatal apertures of the *phot1 phot2* double mutant and *GC1::PHOT2-GFP/phot1 phot2* transgenic plants under darkness or 2.5-h light treatment. The light conditions were the same as in C. *PHOT2-GFP* restored light-induced stomatal opening in *phot1 phot2*. Stomatal apertures are the means of measurements on 25 stomata; error bars represent the SEM. Differences in stomatal aperture were detected using Student *t* test ( $***P < 0.001$ ).



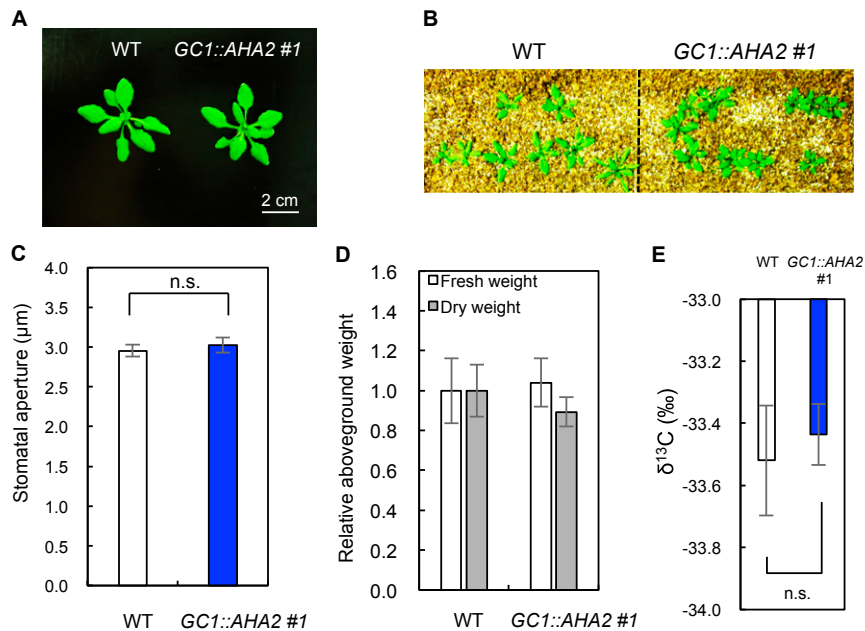

**Fig. S6.** Phenotypic characterization of *AHA2*-transgenic plants under mild drought conditions. WT and transgenic plants were grown in the same planter under normal water conditions (~80% soil water content) until germination. The soil water content was then decreased to 40–50% by reducing the number of waterings. (A and B) Phenotypes of WT and *AHA2*-transgenic plants grown under high light conditions ( $200 \mu\text{mol}\cdot\text{m}^{-2}\cdot\text{s}^{-1}$ ) for 25 d. (C) Stomatal aperture under growth conditions ( $200 \mu\text{mol}\cdot\text{m}^{-2}\cdot\text{s}^{-1}$ ). Error bars represent the SEM ( $n = 30$ ). (D) Relative aboveground fresh and dry weights of 25-d-old plants. (E) Carbon isotope ratios ( $\delta^{13}\text{C}$ ) of WT and *AHA2*-transgenic plants. Error bars represent the SEM ( $n = 5$ ). Significant differences in stomatal aperture were detected using Student *t* test. n.s., not significant ( $P > 0.05$ ).

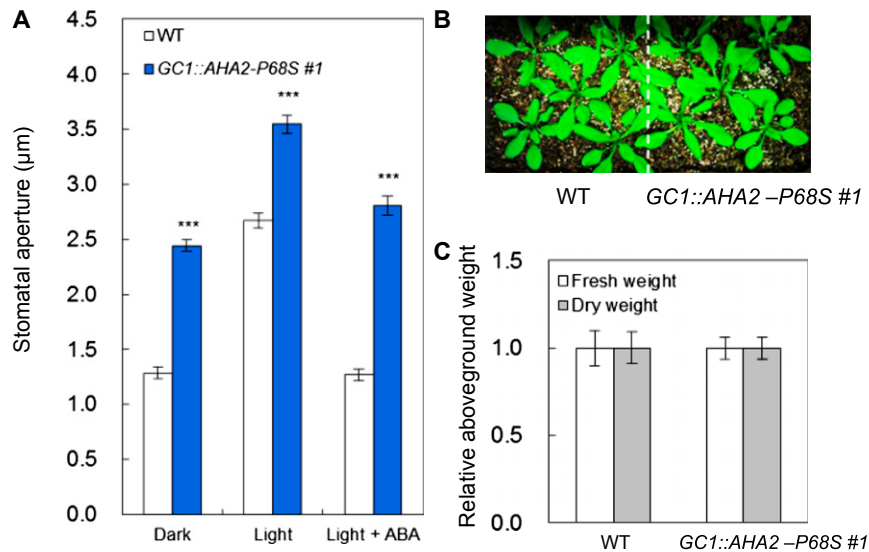

**Fig. S7.** Overexpression of *AHA2* with Pro68-to-Ser point mutation (*AHA2-P68S*) using the *GC1* promoter increases stomatal opening but not plant growth. (A) Stomatal apertures in plants grown under 2.5 h of darkness, light ( $50 \mu\text{mol}\cdot\text{m}^{-2}\cdot\text{s}^{-1}$  red light and  $10 \mu\text{mol}\cdot\text{m}^{-2}\cdot\text{s}^{-1}$  blue light), or light in the presence of  $20 \mu\text{M}$  ABA. (B) Phenotypes of WT and *AHA2-P68S*-transgenic plants (*GC1::AHA2-P68S*) grown under high light conditions ( $200 \mu\text{mol}\cdot\text{m}^{-2}\cdot\text{s}^{-1}$ ) for 25 d. (C) Relative aboveground fresh and dry weights of 25-d-old plants. Fresh and dry weight values are the means of measurements of more than nine plants; error bars represent the SEM. Significant differences were detected by Student *t* test.

**Table S1. Gas-exchange parameters of WT and GC1::AHA2 transgenic plants**

| Parameters                                                                             | WT            | GC1::AHA2 #1               |             | GC1::AHA2 #2             |             |
|----------------------------------------------------------------------------------------|---------------|----------------------------|-------------|--------------------------|-------------|
| Light intensity at 200 $\mu\text{mol}\cdot\text{m}^{-2}\cdot\text{s}^{-1}$             |               |                            |             |                          |             |
| CO <sub>2</sub> assimilation rate, $\mu\text{mol}\cdot\text{m}^{-2}\cdot\text{s}^{-1}$ | 4.34 ± 0.31   | 5.07 ± 0.16*               | $P < 0.05$  | 4.95 ± 0.14*             | $P < 0.05$  |
| Stomatal conductance, $\text{mol}\cdot\text{m}^{-2}\cdot\text{s}^{-1}$                 | 0.070 ± 0.003 | 0.099 ± 0.011 <sup>†</sup> | $P < 0.005$ | 0.099 ± 0.012*           | $P < 0.05$  |
| Ci, $\mu\text{L}\cdot\text{L}^{-1}$                                                    | 267.9 ± 5.8   | 283.6 ± 9.5*               | $P < 0.05$  | 286.4 ± 11.5*            | $P < 0.05$  |
| Transpiration rate, $\text{mmol}\cdot\text{m}^{-2}\cdot\text{s}^{-1}$                  | 1.33 ± 0.08   | 1.84 ± 0.22*               | $P < 0.05$  | 1.74 ± 0.19*             | $P < 0.05$  |
| Water use efficiency                                                                   | 3.28 ± 0.37   | 2.79 ± 0.29                | $P = 0.085$ | 2.88 ± 0.42              | $P = 0.239$ |
| Light intensity at 1,000 $\mu\text{mol}\cdot\text{m}^{-2}\cdot\text{s}^{-1}$           |               |                            |             |                          |             |
| CO <sub>2</sub> assimilation rate, $\mu\text{mol}\cdot\text{m}^{-2}\cdot\text{s}^{-1}$ | 5.08 ± 0.20   | 5.83 ± 0.25 <sup>†</sup>   | $P < 0.005$ | 5.88 ± 0.34*             | $P < 0.05$  |
| Stomatal conductance, $\text{mol}\cdot\text{m}^{-2}\cdot\text{s}^{-1}$                 | 0.082 ± 0.002 | 0.134 ± 0.020 <sup>†</sup> | $P < 0.005$ | 0.128 ± 0.029*           | $P < 0.05$  |
| Ci, $\mu\text{L}\cdot\text{L}^{-1}$                                                    | 266.9 ± 1.6   | 294.9 ± 8.6 <sup>†</sup>   | $P < 0.001$ | 289.3 ± 25.3             | $P = 0.121$ |
| Transpiration rate, $\text{mmol}\cdot\text{m}^{-2}\cdot\text{s}^{-1}$                  | 1.58 ± 0.07   | 2.53 ± 0.49*               | $P < 0.05$  | 2.24 ± 0.26 <sup>†</sup> | $P < 0.005$ |
| Water use efficiency                                                                   | 3.22 ± 0.19   | 2.36 ± 0.41*               | $P < 0.05$  | 2.67 ± 0.47              | $P = 0.082$ |

Measurements were conducted at 380  $\mu\text{L}\cdot\text{L}^{-1}$  CO<sub>2</sub>. Water use efficiency was calculated as the ratio between CO<sub>2</sub> assimilation rate and transpiration rate. Differences were detected by Student *t* test; ± SD ( $n \geq 3$ ). These parameters were concluded from light exposure curves, as plotted in Fig. 2 A and B. Statistically significant: \* $P < 0.05$ ; <sup>†</sup> $P < 0.005$ ; <sup>‡</sup> $P < 0.001$ . Ci, intercellular CO<sub>2</sub> concentration.
